# Supplementary material for: Assessing CO 2 and CH 4 fluxes from mounds of African fungus-growing termites
Source: Copernicus journal article supplement (doi:10.5194/bg-2023-24), 2023-03-14
Supplement: Supplementary file 1 [file bg-2023-24-supplement.pdf]

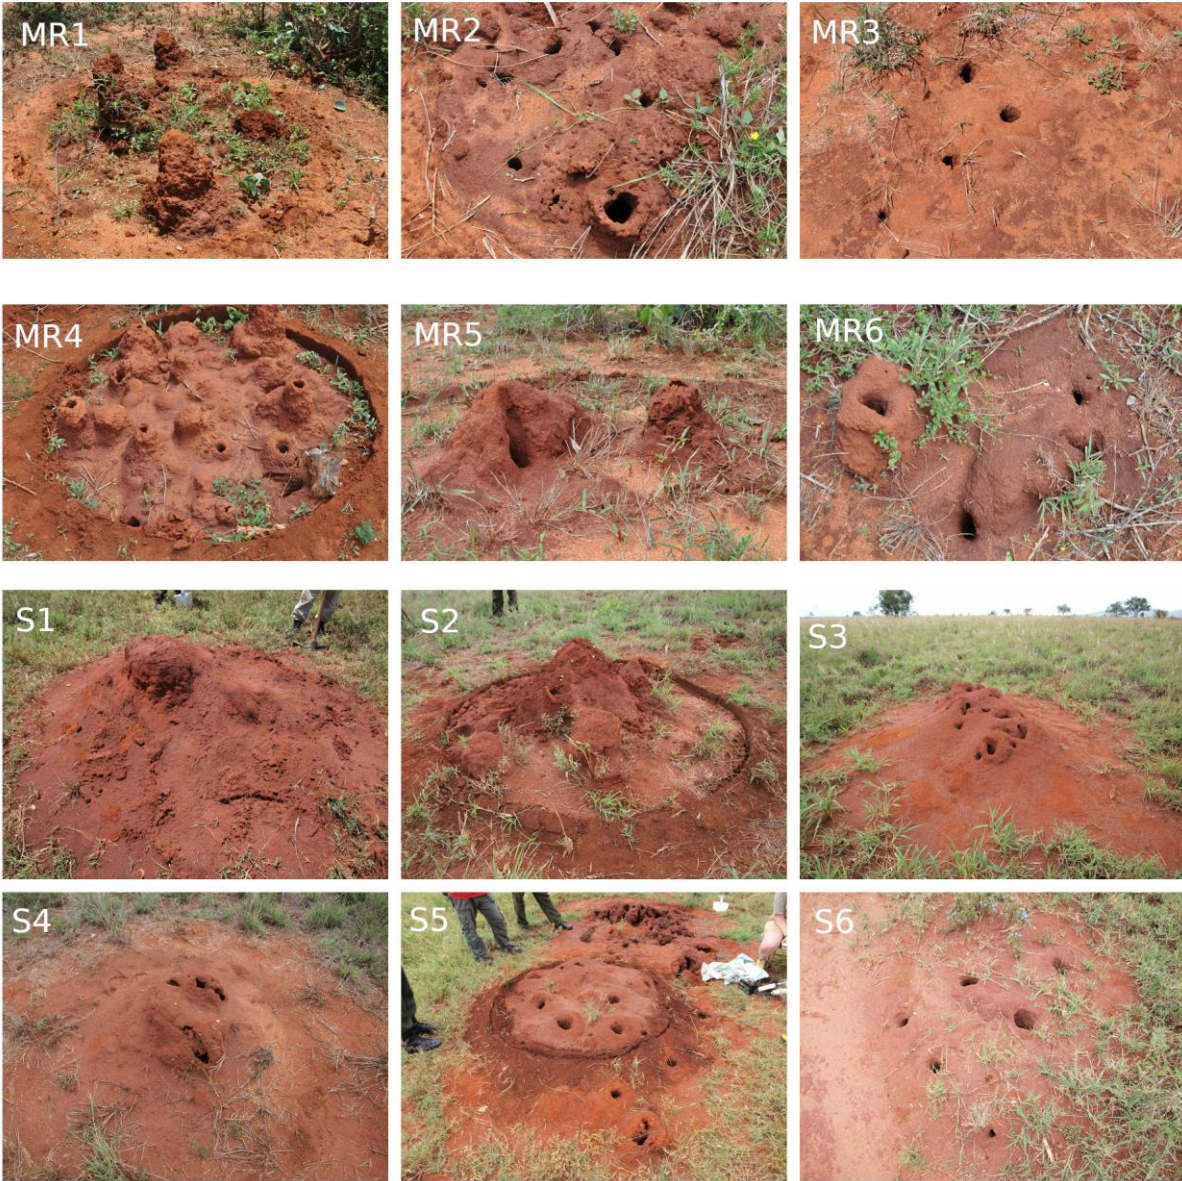

Figure S1. Picture of each termite mound taken in April 2017.

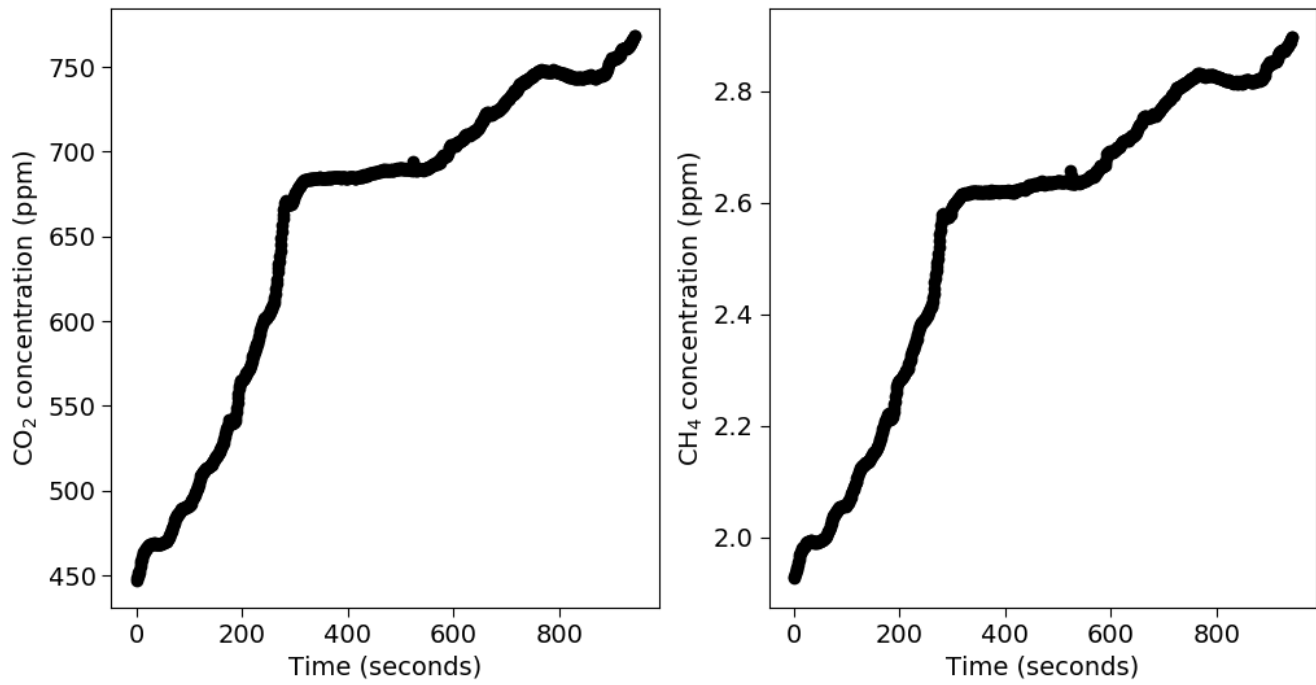

**Figure S2.** Example of nonlinear CO<sub>2</sub> and CH<sub>4</sub> concentration series measured at the S5 mound which could not fit inside the chamber.

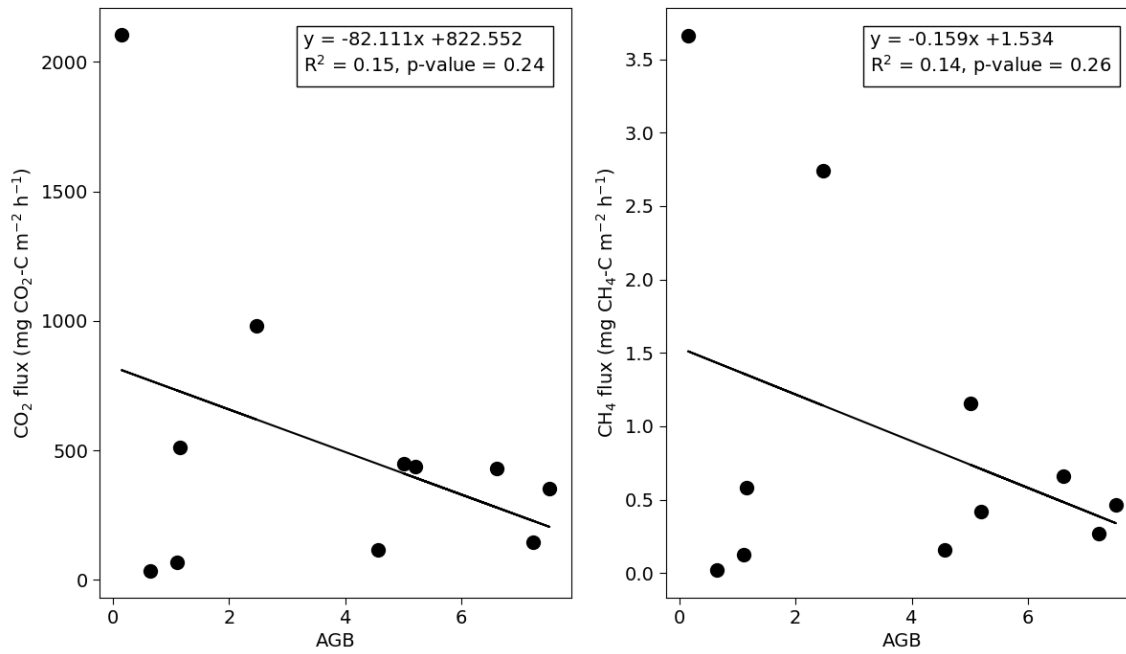

**Figure S3.** The relationship between AGB and dry season mean mound CO<sub>2</sub> and CH<sub>4</sub> fluxes.

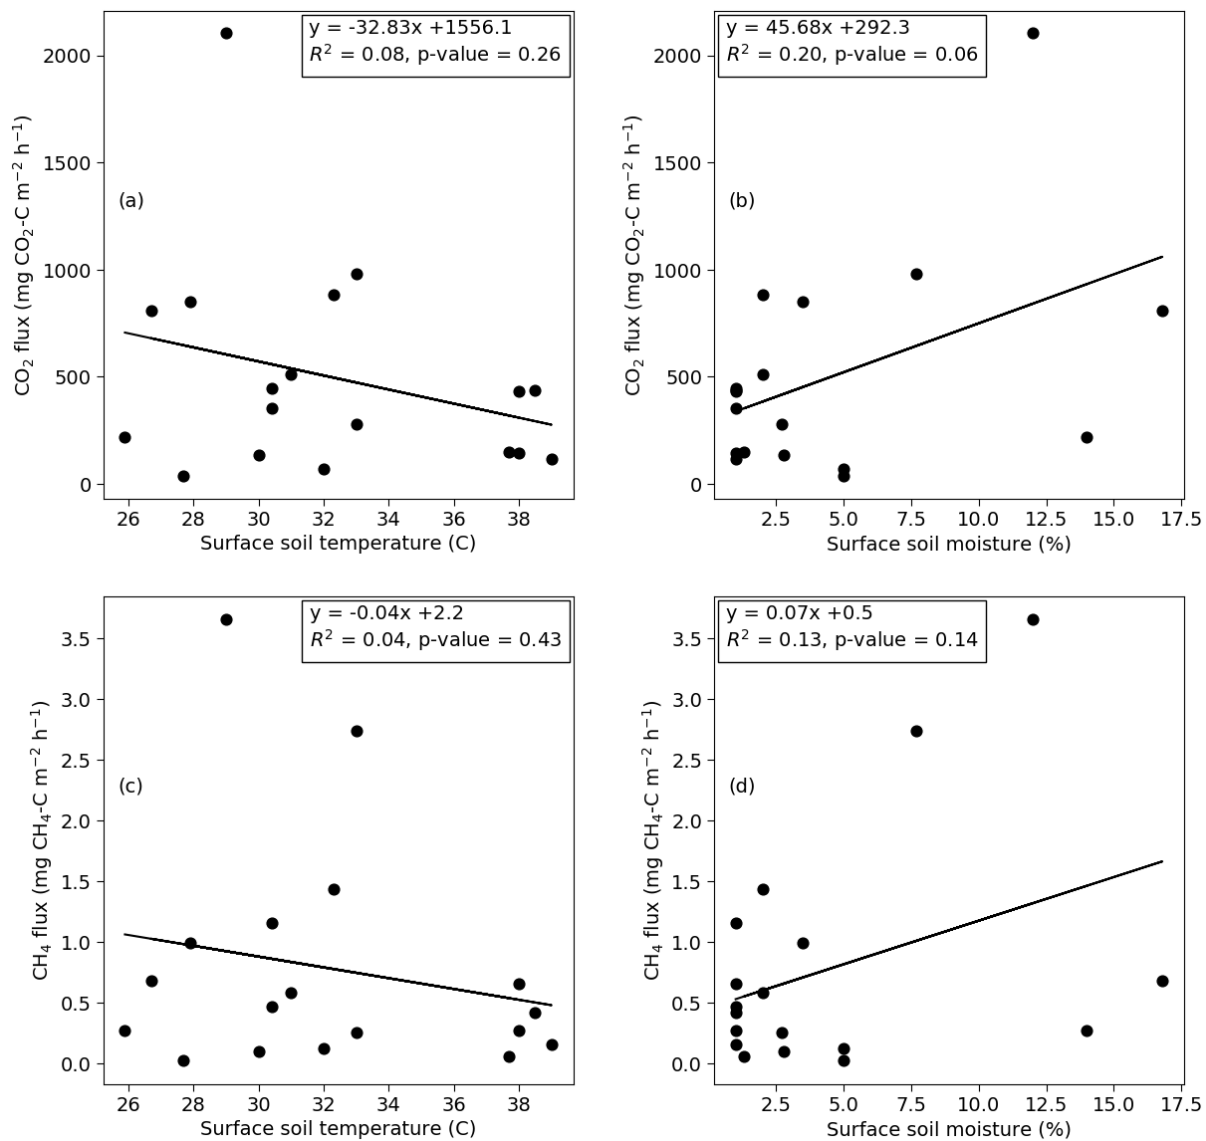

**Figure S4.** The relationship between mean CO<sub>2</sub> flux and (a) surface soil temperature and (b) soil moisture. The relationship between mean CH<sub>4</sub> flux and (c) surface soil temperature and (d) soil moisture.

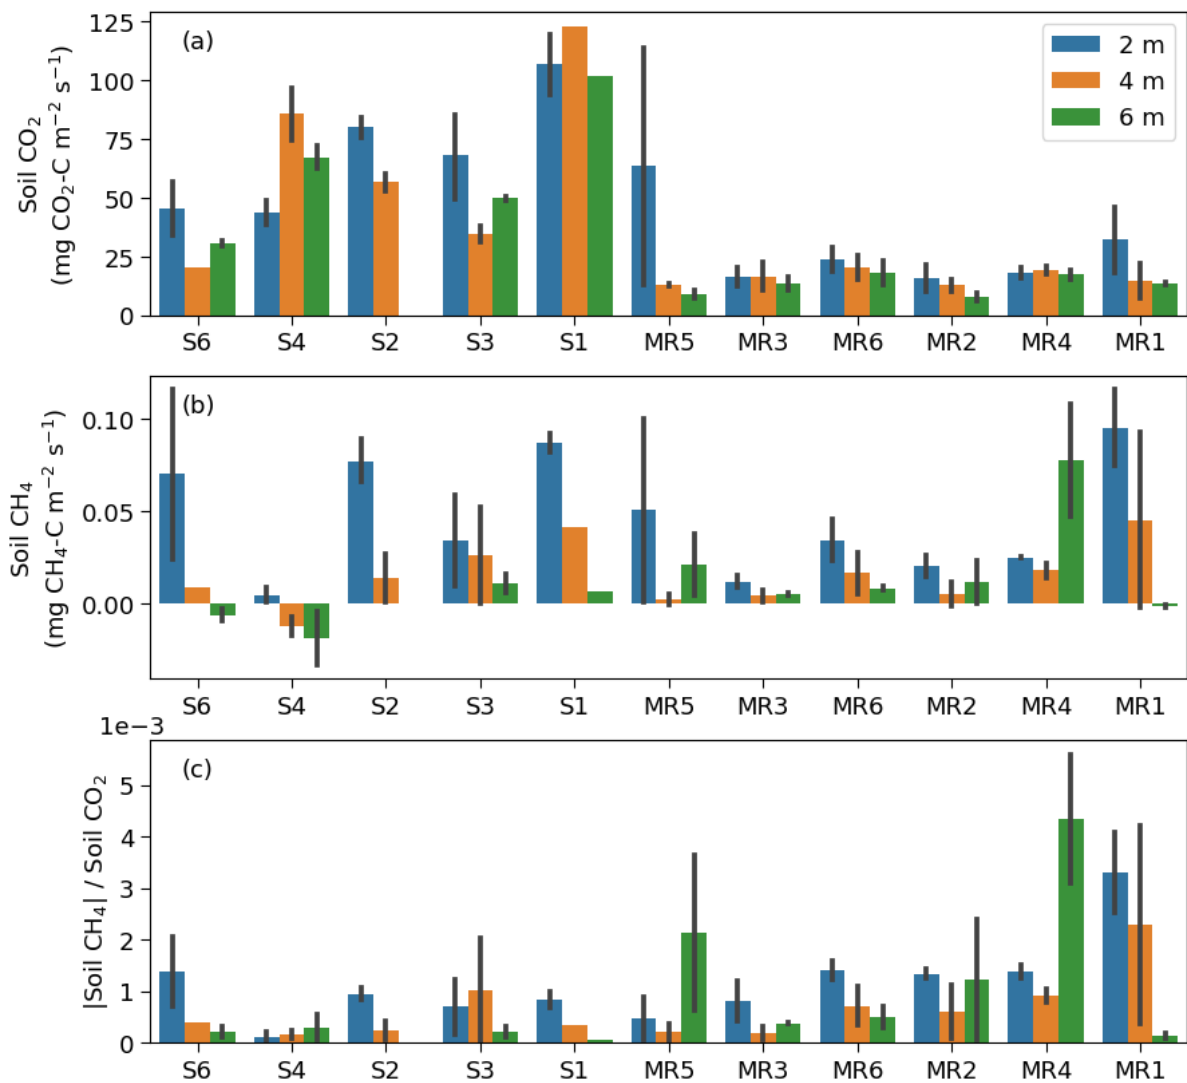

Figure S5. Mean soil CO<sub>2</sub> and CH<sub>4</sub> fluxes around the termite mounds for 2, 4, and 6 m distances from the perimeter of the mound during the dry season. Error bars indicate standard error. (c) The ratio of the absolute value of soil CH<sub>4</sub> and CO<sub>2</sub> flux.

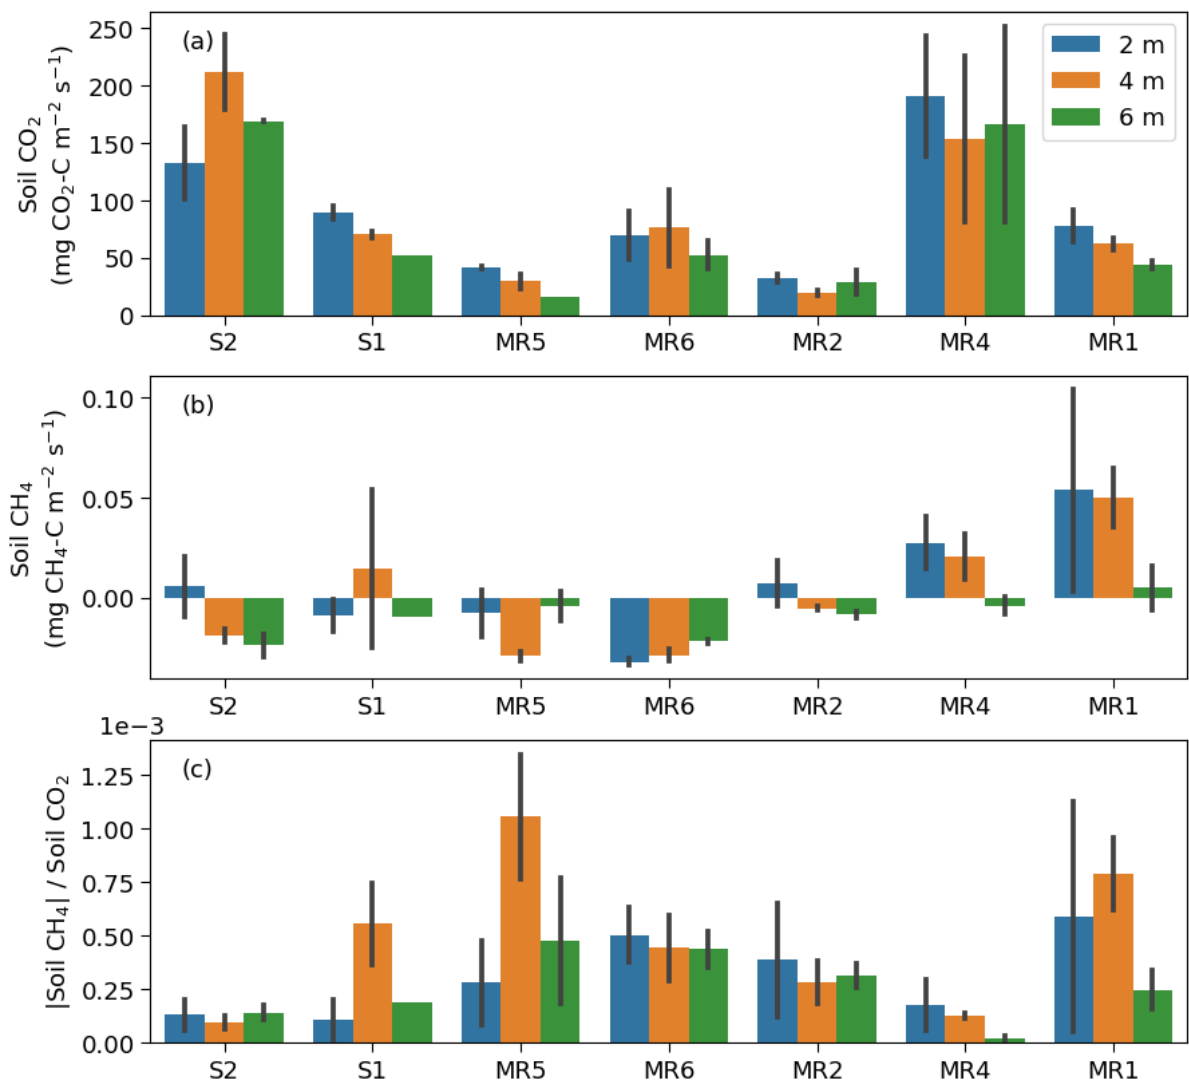

Figure S6. Mean soil CO<sub>2</sub> and CH<sub>4</sub> fluxes around the termite mounds for 2, 4, and 6 m distances from the perimeter of the mound during the wet season. Error bars indicate standard error. (c) The ratio of the absolute value of soil CH<sub>4</sub> and CO<sub>2</sub> flux.

5

10

**Table S1. List of termite mounds for which the volume was estimated using the photogrammetric method.**

| Mound id        | Mean Width (m) | Height (m) | $V_{photo}$ (m <sup>3</sup> ) | $V_{cone}$ (m <sup>3</sup> ) |
|-----------------|----------------|------------|-------------------------------|------------------------------|
| TM36            | 1.4            | 0.25       | 0.130                         | 0.128                        |
| TR09            | 1.3            | 0.20       | 0.100                         | 0.088                        |
| TR172           | 0.8            | 0.10       | 0.010                         | 0.017                        |
| TR184           | 1.1            | 0.15       | 0.020                         | 0.048                        |
| TR185           | 0.8            | 0.15       | 0.010                         | 0.025                        |
| S1 <sup>a</sup> | 2.2            | 0.70       | 0.259                         | 0.887                        |
| S2              | 1.3            | 0.35       | 0.106                         | 0.155                        |
| S3 <sup>a</sup> | 1.1            | 0.30       | 0.217                         | 0.095                        |
| S4              | 0.7            | 0.40       | 0.074                         | 0.051                        |
| S5 <sup>a</sup> | 2.0            | 0.40       | 0.193                         | 0.419                        |

<sup>a</sup> These mounds were not used in the fitting due to a shape that is different from a cone.
